# Supplementary material for: Professional Quality of Life Among Physicians and Nurses Working in Portuguese Hospitals During the Third Wave of the COVID-19 Pandemic
Source: PubMed Central journal article supplement (PMC8845595; doi:10.3389/fpsyg.2022.814109), 2022-01-31
Supplement: Table_1.pdf [file Table_1.pdf]

**Supplementary table** *Regression coefficients for professional quality of life subscales as outcomes and socio-demographic, and professional variables as predictors from univariate simple linear regressions*

|                                                       | Compassion satisfaction |         | Secondary traumatic stress |         | Burnout              |         |
|-------------------------------------------------------|-------------------------|---------|----------------------------|---------|----------------------|---------|
|                                                       | B [95%CI]               | p-value | B [95%CI]                  | p-value | B [95%CI]            | p-value |
| Gender                                                |                         |         |                            |         |                      |         |
| Male                                                  | Reference               |         | Reference                  |         | Reference            |         |
| Female                                                | -0.23 [-1.23; 0.78]     | 0.656   | 2.33 [1.33; 3.33]          | <0.001  | 0.40 [-0.60; 1.41]   | 0.429   |
| Occupation                                            |                         |         |                            |         |                      |         |
| Nurse                                                 | Reference               |         | Reference                  |         | Reference            |         |
| Physician                                             | -0.61 [-1.45; 0.24]     | 0.158   | -0.55 [-1.40; 0.31]        | 0.210   | 0.12 [-0.72; 0.97]   | 0.775   |
| Parents                                               |                         |         |                            |         |                      |         |
| No                                                    | Reference               |         | Reference                  |         | Reference            |         |
| Yes                                                   | 1.31 [0.53; 2.09]       | 0.001   | 0.29 [-0.51; 1.08]         | 0.479   | -0.82 [-1.60; -0.04] | 0.041   |
| Work experience                                       |                         |         |                            |         |                      |         |
| Five years or less                                    | Reference               |         | Reference                  |         | Reference            |         |
| From 6 to 10 years                                    | -1.08 [-2.33; 0.17]     | 0.091   | -0.08 [-1.35; 1.19]        | 0.906   | 1.46 [0.21; 2.71]    | 0.022   |
| From 11 to 15 years                                   | 0.71 [-0.53; 1.95]      | 0.261   | -0.48 [-1.74; 0.78]        | 0.455   | -0.04 [-1.28; 1.20]  | 0.946   |
| More than 15 years                                    | 1.02 [-0.01; 2.04]      | 0.052   | -0.14 [-1.19; 0.90]        | 0.789   | -0.21 [-1.24; 0.82]  | 0.692   |
| Length of service in current unit                     |                         |         |                            |         |                      |         |
| 6 months or less                                      | Reference               |         | Reference                  |         | Reference            |         |
| Between 6 months and 1 year                           | -0.31 [-1.83; 1.21]     | 0.685   | -0.61 [-2.15; 0.93]        | 0.439   | 0.75 [-0.77; 2.27]   | 0.333   |
| Between 2 and 5 years                                 | 0.00 [-1.34; 1.34]      | 0.996   | -0.31 [-1.67; 1.04]        | 0.649   | 0.66 [-0.68; 2.01]   | 0.332   |
| Between 6 and 10 years                                | -0.07 [-1.56; 1.42]     | 0.926   | -0.71 [-2.22; 0.81]        | 0.360   | 0.67 [-0.82; 2.17]   | 0.377   |
| Between 11 and 15 years                               | 1.38 [-0.20; 2.96]      | 0.087   | -1.21 [-2.81; 0.39]        | 0.138   | -0.64 [-2.22; 0.94]  | 0.427   |
| More than 15 years                                    | 1.13 [-0.25; 2.51]      | 0.109   | 0.02 [-1.37; 1.42]         | 0.976   | 0.07 [-1.31; 1.45]   | 0.915   |
| COVID                                                 |                         |         |                            |         |                      |         |
| Directly involved in caring for COVID-19 patients     | Reference               |         | Reference                  |         | Reference            |         |
| Not directly involved in caring for COVID-19 patients | -0.13 [-0.91; 0.66]     | 0.753   | -0.35 [-1.14; 0.44]        | 0.387   | -0.42 [-1.20; 0.36]  | 0.292   |
| Working Hours                                         |                         |         |                            |         |                      |         |
| Group 1                                               | Reference               |         | Reference                  |         | Reference            |         |
| Group 2                                               | -0.44 [-1.31; 0.42]     | 0.313   | 0.29 [-0.59; 1.16]         | 0.523   | 0.71 [-0.15; 1.58]   | 0.107   |
| Group 3                                               | -0.17 [-1.34; 1.01]     | 0.782   | 0.53 [-0.67; 1.72]         | 0.388   | 1.86 [0.68; 3.04]    | 0.002   |
